# Supplementary material
Source: PubMed Central journal article supplement (PMC10191176)
Supplement: NIHMS1893400-supplement-Supplementary_tables.pdf [file NIHMS1893400-supplement-Supplementary_tables.pdf]

**Supplementary Table 1. X-ray data collection and refinement statistics**

|                                       | hLAG3*:F7                   | hLAG3 <sup>D34</sup> :F7 | mLAG3 <sup>D12</sup>   | FGL1 <sup>FD</sup>       |
|---------------------------------------|-----------------------------|--------------------------|------------------------|--------------------------|
| <b>Data Collection</b>                |                             |                          |                        |                          |
| Wavelength (Å)                        | 1.0332                      | 1.033                    | 1.0000                 | 0.97918                  |
| Space group                           | P 21 21 21                  | C 1 2 1                  | P 1 21 1               | P 2 21 21                |
| Unique reflections                    | 19409 (1894)                | 34601 (3383)             | 29753 (2954)           | 25188 (2424)             |
| a, b, c (Å)                           | 78.44,<br>142.93,<br>158.17 | 119.16 78.52<br>107.17   | 35.73 92.53 81.77      | 45.28, 110.89,<br>148.89 |
| $\alpha, \beta, \gamma$ (°)           | 90.00, 90.00,<br>90.00      | 90.00, 111.44,<br>90.00  | 90.00, 90.78,<br>90.00 | 90.00, 90.00,<br>90.00   |
| Resolution (Å)                        | 45.62-3.71                  | 36.53 - 2.43             | 40.27-2.12             | 45.3 - 2.55              |
| R <sub>merge</sub>                    | 0.196 (1.127)               | 0.068 (0.822)            | 0.0816 (1.205)         | 0.337 (1.311)            |
| I/ $\sigma$ (I)                       | 7.55 (1.56)                 | 11.35 (1.64)             | 9.01 (1.09)            | 7.52 (1.83)              |
| Completeness (%)                      | 99.78 (99.58)               | 99.55 (98.25)            | 98.45 (99.19)          | 99.51 (98.29)            |
| Multiplicity                          | 5.1 (5.0)                   | 3.4 (3.5)                | 3.8 (4.0)              | 5.8 (4.6)                |
| CC1/2                                 | 0.994 (0.529)               | 0.997 (0.707)            | 0.997 (0.605)          | 0.929 (0.404)            |
| <b>Refinement</b>                     |                             |                          |                        |                          |
| Resolution (Å)                        | 45.62-3.71                  | 36.53 - 2.43             | 40.27 - 2.12           | 45.3 - 2.55              |
| R <sub>work</sub> / R <sub>free</sub> | 0.236/0.283                 | 0.211/0.253              | 0.212/0.237            | 0.188/0.233              |
| <b>No. of Atoms</b>                   |                             |                          |                        |                          |
| Protein                               | 8618                        | 5904                     | 3227                   | 5625                     |
| Ligand                                | 98                          | 28                       | 64                     | 0                        |
| Water                                 | 0                           | 169                      | 81                     | 129                      |
| <b>B-Factors (Å<sup>2</sup>)</b>      |                             |                          |                        |                          |
| Protein                               | 147.5                       | 73.3                     | 76.16                  | 42.19                    |
| Ligand                                | 194.06                      | 120.36                   | 81.9                   | N/A                      |
| Water                                 | N/A                         | 55.54                    | 83.57                  | 35.55                    |
| <b>RMSDs</b>                          |                             |                          |                        |                          |
| Bond length (Å)                       | 0.006                       | 0.005                    | 0.006                  | 0.009                    |
| Bond angles (°)                       | 1.10                        | 0.81                     | 1.06                   | 1.14                     |
| <b>Ramachandran Plot (%)</b>          |                             |                          |                        |                          |
| Favored region                        | 93.8                        | 96.45                    | 98.28                  | 97.03                    |
| Allowed region                        | 6.2                         | 3.56                     | 1.23                   | 2.97                     |
| Outlier region                        | 0                           | 0                        | 0.49                   | 0                        |
| PDB ID                                | 7TZG                        | 7TZH                     | 7TZE                   | 7TZ2                     |

Values in parentheses represent outer shell. RMSD: root mean-square deviation.

**Supplementary Table 2. Yeast-display mutant library primers**

| Yeast library                         | Primer  | Sequence 5' → 3'                                                  |
|---------------------------------------|---------|-------------------------------------------------------------------|
| hLAG3 <sup>D12</sup><br>EP-PCR        | Forward | GTTTTCAATATTTCTGTTATTGCTAGCGTTTTAGCAGCTC<br>CAGTGAAGCCTCTCCAG     |
|                                       | Reverse | CCAAGTCTTCTTCGGAGATAAGCTTTTGTTCAGAACAGT<br>GAGGTTATACAT           |
| hLAG3 <sup>D12</sup><br>amplification | Forward | CGGTTTGTATTACTTCTTATTCAAATG                                       |
|                                       | Reverse | GGGATTTGCTCGCATATAGTTG                                            |
| FGL1 <sup>FD</sup> EP-<br>PCR         | Forward | TTCAATATTTCTGTTATTGCTAGCGTTTTAGCATTGCAG<br>GAGAATGAAGTCCAGTTCCTTG |
|                                       | Reverse | CCCAAGTCTTCTTCGGAGATAAGCTTTTGTTC AATTACATT<br>TGGAATAAAATCATT     |
| FGL1 <sup>FD</sup><br>amplification   | Forward | CGGTTTGTATTACTTCTTATTCAAATG                                       |
|                                       | Reverse | GGGATTTGCTCGCATATAGTTG                                            |
